# Supplementary material for: Epstein-Barr virus–encoded EBNA2 downregulates ICOSL by inducing miR-24 in B-cell lymphoma
Source: PubMed Central journal article supplement — Blood. 2023 Oct 20;143(5):429–43. doi: 10.1182/blood.2023021346 (PMC10862363; doi:10.1182/blood.2023021346), 2023-10-20
Supplement: BLOOD_BLD-2023-021346-mmc1.pdf [file BLOOD_BLD-2023-021346-mmc1.pdf]

## **Supplementary material and methods:**

### **Cell lines**

The details of the EBNA2 coding sequence carrying B95-8 and EBNA2 negative P3HR1 strain infected BLs are in Supplementary Table 1. All cells were cultured in RPMI-1640 medium, supplemented with 10% fetal bovine serum (FBS), 100 U/mL penicillin, 100µg/mL streptomycin, and L-glutamine. Cell lines were maintained at 37°C in an incubator in a humidified atmosphere of 5% CO<sub>2</sub>.

### **Immunoblotting**

The PVDF membranes were stained with Ponceau Red to confirm the success of the transfer, then washed with PBS-Tween 0,1% (PBS-T) and incubated for 1 hour in a blocking buffer, composed of 5% non-fat dried milk in PBS-T. EBNA2 expression was verified by using a mouse monoclonal antibody, PE2 (Novus, Bio-Techne) at 1:250 dilution in milk 5% PBS-T. The expression of c-MYC was detected by a rabbit monoclonal antibody c-Myc (D84C12) (Cell Signaling Technology) and β-actin (Santa Cruz Biotechnology) was used as a loading control. As secondary antibodies, HRP conjugated mouse (Millipore-Sigma) or goat anti-rabbit (ADVASTA) abs were used. The proteins were detected using Western Bright ECL HRP chemiluminescent substrate kit and the images acquired by an automatic developer. Each immunoblot was repeated at least three times. Bcl-2 expression was verified by using a rabbit monoclonal antibody, (D55G8, Cell Signaling) at 1:250 dilution in milk 5% PBS-T. β-actin (Santa Cruz Biotechnology) was used at 1:5000 in BSA 5% as a loading control.

### **Densitometry analysis of immunoblots**

Densitometry analysis was performed with Image J 1.53t. Quantification of protein bands, corresponding to EBNA2, c-Myc, and BCL2 expression and the loading control β-actin, was measured by inverting the pixel density of each protein band as 255-x (x is the “Grey mean value” recorded by ImageJ). The inverted background was then subtracted from the inverted band value. Finally, the relative quantification of each protein band was calculated as a ratio: EBNA2/ β-actin, c-Myc/ β-actin, and BCL2/ β-actin.

## Prediction of miR-24 as a potential ICOSL targeting miRNA

To better understand the molecular mechanisms of ICOSL downregulation by EBNA2, several previous observations were helpful that led us to focus on miR-24. Cameron et al (2008) had shown that Lat III expressing BLs express higher miR-24. Our published data also indicated that EBNA2 transfected U2932 DLBCL cells have higher miR-24 (Rosato et al, 2012).<sup>30</sup> A bioinformatic analysis had suggested regulation of ICOSL expression by miR-24 (Veksler-Lublinsky et al).<sup>48</sup> Similarly, a couple of miRNA-mRNA prediction algorithms like TargetScan and miRWalk identified ICOSL as a potential target of miR-24.

**TargetScan 8.0** predicts biological targets of miRNAs by searching for the presence of conserved 8mer, 7mer, and 6mer sites that match the seed region of each miRNA (Lewis et al., 2005). As seen in the table below the metrics used for the strength of predictions are:

A: The site type strongly influences the efficacy of repression. The most effective in order of decreasing preferential conservation and efficacy sites are:

-8mer, (Watson–Crick match to miRNA positions 2–8 with an A opposite position 1

-7mer-m8, (position 2–8 match) and

-7mer-A1 sites, (position 2–7 match with an A opposite position 1) (Lewis et al., 2005).

As seen in the table below, in the case of miR-24-ICOSL pairing, the type of sites are the most effective and the number of sites (four) may impart additional repression.

B: The context<sup>++</sup> score (CS) of miRNA targeting efficacy for a specific site is the sum of 14 different features of the miRNA, miRNA site, or mRNA—including the mRNA sequence around the site—to predict which sites within mRNAs are most effectively targeted by miRNAs (Agarwal et al., 2015).

The context score thus is the sum of these features and a negative score is associated with a more favorable site. In addition, a high context score percentile (between 50 and 100) shows that a specific site is more favorable than most other sites of this miRNA. Indeed, as seen in the table below, the miR-24 and ICOSL interaction context score and the context score percentile indicate this interaction as very likely.

|                                                      | Predicted consequential pairing of target region (top) and miRNA (bottom)                       | Site type | Context++ score | Context++ score percentile | Weighted context++ score | Conserved branch length | P <sub>CT</sub> |
|------------------------------------------------------|-------------------------------------------------------------------------------------------------|-----------|-----------------|----------------------------|--------------------------|-------------------------|-----------------|
| Position 669-675 of ICOSLG 3' UTR<br>hsa-miR-24-3p   | 5' . . . GUUCCGGUGAAAAGUUGAGCCAC . . .<br>                      <br>3' GACAAGGACGACUUG--ACUCGGU | 7mer-A1   | -0.09           | 77                         | -0.09                    | 0.017                   | < 0.1           |
| Position 1493-1499 of ICOSLG 3' UTR<br>hsa-miR-24-3p | 5' . . . AAAAAAGUCCUACCUAGACCU . . .<br>                      <br>3' GACAAGGACGACUUGACUCGGU     | 7mer-m8   | -0.19           | 91                         | -0.19                    | 0                       | < 0.1           |
| Position 3725-3732 of ICOSLG 3' UTR<br>hsa-miR-24-3p | 5' . . . CCGCCCAUCCUCAUC--CUGAGCCA . . .<br>                     <br>3' GACAAGGACGACUUGACUCGGU  | 8mer      | -0.03           | 57                         | 0.00                     | 0.042                   | < 0.1           |
| Position 4344-4350 of ICOSLG 3' UTR<br>hsa-miR-24-3p | 5' . . . UUAUUUUUUUUUUUUUGAGCCAG . . .<br>     <br>3' GACAAGGACGACUUGACUCGGU                    | 7mer-A1   | -0.07           | 72                         | -0.01                    | 0.229                   | < 0.1           |

As for the miRwalk prediction, the score is calculated from a random-forest based approach by executing TarPmiR algorithm for miRNA target site prediction. Based on the training data, it shows the probability that this interaction "works". As seen in the table below, the score=1 regarding miR-24 interaction with its target ICOSL at two CDS sites indicates that there is a high probability that this interaction will happen.

| Interactions                                                                                      |                                                                                            |                                                                                              |                                                                                          |                                                                                         |                                                                                            |                                                                                                  |                                                                                        |                                                                                        |                                                                                                |
|---------------------------------------------------------------------------------------------------|--------------------------------------------------------------------------------------------|----------------------------------------------------------------------------------------------|------------------------------------------------------------------------------------------|-----------------------------------------------------------------------------------------|--------------------------------------------------------------------------------------------|--------------------------------------------------------------------------------------------------|----------------------------------------------------------------------------------------|----------------------------------------------------------------------------------------|------------------------------------------------------------------------------------------------|
| Mirna            | Refseqid  | Genesymbol  | Duplex  | Score  | Position  | Binding Site  | Au  | Me  | N Pairings  |
| hsa-miR-17-5p                                                                                     | NM_001283050                                                                               | ICOSLG                                                                                       | <a href="#">details</a>                                                                  | 0.85                                                                                    | CDS                                                                                        | 969,1008                                                                                         | 0.43                                                                                   | -11.681                                                                                | 16                                                                                             |
| hsa-miR-17-3p                                                                                     | NM_001283050                                                                               | ICOSLG                                                                                       | <a href="#">details</a>                                                                  | 0.92                                                                                    | CDS                                                                                        | 969,1006                                                                                         | 0.41                                                                                   | -6.236                                                                                 | 19                                                                                             |
| hsa-miR-19a-5p                                                                                    | NM_001283050                                                                               | ICOSLG                                                                                       | <a href="#">details</a>                                                                  | 0.85                                                                                    | CDS                                                                                        | 210,231                                                                                          | 0.41                                                                                   | -9.061                                                                                 | 17                                                                                             |
| hsa-miR-19b-1-5p                                                                                  | NM_001283050                                                                               | ICOSLG                                                                                       | <a href="#">details</a>                                                                  | 0.92                                                                                    | CDS                                                                                        | 946,970                                                                                          | 0.35                                                                                   | -15.567                                                                                | 17                                                                                             |
| hsa-miR-21-3p                                                                                     | NM_001283050                                                                               | ICOSLG                                                                                       | <a href="#">details</a>                                                                  | 0.85                                                                                    | CDS                                                                                        | 933,956                                                                                          | 0.37                                                                                   | -8.304                                                                                 | 18                                                                                             |
| hsa-miR-22-5p                                                                                     | NM_001283050                                                                               | ICOSLG                                                                                       | <a href="#">details</a>                                                                  | 1.00                                                                                    | CDS                                                                                        | 211,253                                                                                          | 0.5                                                                                    | -7.782                                                                                 | 15                                                                                             |
| hsa-miR-23a-5p                                                                                    | NM_001283050                                                                               | ICOSLG                                                                                       | <a href="#">details</a>                                                                  | 1.00                                                                                    | CDS                                                                                        | 320,343                                                                                          | 0.44                                                                                   | -5.481                                                                                 | 17                                                                                             |
| hsa-miR-24-1-5p                                                                                   | NM_001283050                                                                               | ICOSLG                                                                                       | <a href="#">details</a>                                                                  | 0.92                                                                                    | CDS                                                                                        | 195,218                                                                                          | 0.41                                                                                   | -8.005                                                                                 | 16                                                                                             |
|  hsa-miR-24-3p | NM_001283050                                                                               | ICOSLG                                                                                       | <a href="#">details</a>                                                                  | 1.00                                                                                    | CDS                                                                                        | 635,676                                                                                          | 0.48                                                                                   | -7.238                                                                                 | 14                                                                                             |
| hsa-miR-24-3p                                                                                     | NM_001283050                                                                               | ICOSLG                                                                                       | <a href="#">details</a>                                                                  | 1.00                                                                                    | CDS                                                                                        | 457,480                                                                                          | 0.46                                                                                   | -4.994                                                                                 | 18                                                                                             |

### Quantitative real time PCR

RNA was extracted from  $1 \times 10^6$  cells. One  $\mu$ l of each cDNA sample was subjected to qPCR to amplify the mature miR-24 (also known as miR-24-3p) and the housekeeping RNAU6 (TaqMan® Assays, Thermo Fisher Sc.). All the q-PCRs were performed in an Applied Biosystems\StepOne Software v2.2.2 QPCR machine. The fold change of each transcript was calculated by the  $2^{-\Delta\Delta C_t}$  formula.

### Flow cytometry analysis

CD4<sup>+</sup> and CD8<sup>+</sup> T cells were stained respectively with APC mouse anti-human and Pacific Blue mouse anti-human (BD Pharmingen) antibodies. Interferon- $\gamma$  was detected with PE.Cy7 mouse anti-human IFN- $\gamma$ . The staining was performed using the BD cytofix/cytoperm plus

fixation/permeabilization kit, containing the Golgi plug protein transport inhibitor, brefeldin (BD Biosciences).

### **Digital droplet PCR**

Forty ng RNA was used for cDNA synthesis. The PCR mixture was loaded in a disposable droplet generator to create oil-emulsion droplets and transferred to a 96-well PCR plate, sealed, and quantified at the endpoint in a QX200 Droplet Reader System using QuantaSoft software (Bio-Rad Laboratories, Hercules, CA, USA). The fraction of positive droplets was quantified assuming a Poisson distribution. The samples were run in triplicates, and the concentration results were expressed as the number of copies of each transcript/ $\mu\text{L}$  sample.

### **Mixed lymphocyte reactions**

After separation, PBMCs were seeded in 24-well non-tissue culture-treated plates (Falcon, Fisher, Pittsburgh, PA, USA), previously coated with anti-CD3 and anti-CD28 (Pharmingen, San Diego, CA, USA) at the concentration of  $1\ \mu\text{g}/\text{mL}$  in PBS at  $0.4\ \text{mL}/\text{well}$  overnight at  $4^\circ\ \text{C}$ . The next day, after washing the plates in  $1\ \text{ml}$  PBS, PBMCs were added to the CD3/CD28 coated wells at a density of one million cells/well and cultivated for 72 hours in order to activate the CD4<sup>+</sup> and CD8<sup>+</sup> T cell population. One day before seeding,  $1\times 10^5$  stimulators U2932 MPA vector and U2932 EBNA2 cl-1 cells were transiently transfected with  $40\ \text{nM}$  miR-24 inhibitor and the corresponding negative control. The stimulators were then exposed to a sub-lethal dosage of 5Gy for two minutes and subsequently placed in co-culture with activated  $1\times 10^6$  PBMCs for 48 hours.

### **Apoptosis and cell proliferation assays**

The detection of the percentage of early apoptotic (only Annexin V), late apoptotic (both Annexin V/7-AAD) and necrotic cells (only 7AAD) was done 48h post-transfection, by using CytoFLEX Flow Cytometer (Beckman coulter Life Sciences) and analyzed with CytExpert software.

As for the cellular proliferation assays,  $2 \times 10^5$  cells/ml were seeded and counted daily. Trypan blue exclusion assay was performed to estimate the number of cells/ml at 24, 48, 72 and 96 hours, after transfecting U2932 vector or EBNA2 transfectants with control inhibitor or anti-miR-24. Statistical significance was calculated with ordinary one-way ANOVA Tukey's multiple comparisons test.

### **DLBCL cohort**

We interrogated our archives both at Sapienza and Siena Universities for DLBCL cases diagnosed at our centers between 2018 and 2023. A total of 1113 DLBCLs were found. Twenty-two cases representing different DLBCL types were selected for further studies. The cohort is enriched in EBNA2 positive cases. Eight out of nine EBNA2<sup>+</sup> cases were included in the study. One EBNA2 positive case from the Siena cohort was unavailable.

### **Immunohistochemistry**

For EBNA2 IHC, sections were deparaffinized (BOND DeWax Solution, Leica Biosystems) and rehydrated with graded ethanol to distilled water. Antigen retrieval was performed in BOND Epitope Retrieval Solution 2 (ER2, Leica Biosystems) at pH 9 for 30 minutes at 95°C. The sections were stained with anti-EBNA2 (NBP2-50382, NOVUS), at 1:150 dilution, followed by incubation with the secondary antibody using the Bond Polymer Refine Red Detection (Leica Microsystems, Newcastle, United Kingdom), a polymeric AP-linker antibody conjugate system containing Fast Red solution as substrate chromogen.

For ICOSL, after antigen retrieval with Cell conditioner 1 (CC1, Ventana) at pH 6, for 20 min at 95°C, FFPE sections were incubated with anti-ICOSL antibody (CD274) (PA5-96572, Invitrogen) at 1:120 dilution for 40 minutes followed by incubation with a cocktail of enzyme-labeled secondary antibodies (HQ Universal linker and Multimer, Ventana). This complex was visualized with hydrogen peroxidase substrate and DAB chromogen, which produce a brown precipitate. Slides were then counterstained with Hematoxylin for 4 min and washed with reaction buffer. Finally, the slides were manually dehydrated through an ethanol series ( $2 \times 80\%$  ethanol, 1 min each,  $2 \times 90\%$  ethanol, 1 min each,  $3 \times 100\%$  ethanol, 1 min each,  $3 \times$  xylene, 1 min each), at room temperature, and mounted in Cytoseal xyl

(ThermoFisher Scientific, Waltham, MA). In parallel, tissue sections from the same cases without antibodies were used as a negative control.

### **RNA extraction from FFPE sections**

Five sections (10  $\mu$ m) were obtained from FFPE tissues using fresh blades for each sample. The microtome was cleaned with absolute ethanol after each tissue block. Sections were collected in 1.5 ml tubes and deparaffinized twice with 1 ml xylene, pellets were washed with ethanol and incubated with Lysis Buffer (SV Total RNA isolation system - Promega) following the manufacturer's instructions. The concentration and quality of the RNA was evaluated using a NanoDrop ND-1000 Spectro-photometer (Thermo Fisher Scientific, Inc. USA).

### **Pre-miR-24 expression by RT-qPCR in U2932 EBNA2 and BJABK3**

Precursor of miR-24, and U6 transcripts were detected using predesigned miScript Primer Assay primers purchased from QIAGEN. q-PCR assays, was used miScript SYBR Green PCR Kit (QIAGEN). All the q-PCRs were performed in an Applied Biosystems\StepOne Software v2.2.2 QPCR machine. The fold change of each transcript was calculated by the  $2^{-\Delta\Delta C_t}$  formula.

### **Statistical analysis**

Prism 9 software was employed for the data analysis. Measurement data that followed a normal distribution were expressed using mean and standard deviation. In comparing more than two groups, one-way ANOVA, Tukey's and Dunnett's test were employed, while two-tailed unpaired t test was used for comparing two groups. A statistically significant difference was only considered when the P-value was less than 0.05.

### **Supplementary figure legends**

#### **S Figure 1: Densitometry analysis of immunoblots**

**A:** represents blots in Figure 1A; **B:** represents blots in Figure 2Ai and Bi; **C:** represents immunoblots in figure 6A. The statistical analysis was done using ordinary one-way ANOVA

Tukey's multiple comparisons test for S1A and S1C and by unpaired t test for S1B. P values indicate the significance of the mean with SD for each sample from three densitometry analyses.

**S Figure 2: Decrease of pre-miR-24 in U2932 and BJABK3 expressing EBNA2**

RT-qPCR quantification of the precursor-miR-24 (pre-miR-24) levels in

**Ai:** U2932 EBNA2 vs U2932 MPA vec, and

**ii:** in estradiol induced EBNA2 expressing BJABK3 vs its uninduced parental BJABK3. The housekeeping RNU6 was used to normalize the levels of pre-miR-24 in each sample. The P values were calculated through two-tailed unpaired t test. \*  $p < 0.05$ , \*\*\*\*  $p < 0.0001$ .

**S Figure 3: Inhibition of miR-24 decreases BCL-2 expression in U2932 EBNA2 transfected cells**

Immunoblotting analysis of BCL2 in U2932 EBNA2 transfected with cntr inhibitor and anti-miR-24.  $\beta$ -actin was used as a loading control. Densitometry analysis shows relative quantification of decrease in BCL-2 expression normalized to  $\beta$ -actin expression from three independent experiments. Two-tailed unpaired t test was applied to estimate the p value. \*\*  $p < 0.01$ .

**S Figure 4: Cumulative incidence of DLBCL cases diagnosed at our centers between 2018-2023.**

**S Figure 5: ICOSL expression in EBV negative GC (A and B) and non-GC (C and D) DLBCL biopsies by IHC**

**S Figure 6: EBNA2 and ICOSL expression in non-GC DLBCL biopsies**

Expression of EBNA2 and ICOSL in five additional cases of EBV+/EBNA2+ non-GC biopsies is shown.

**S Figure 7: ICOSL expression in reactive lymph node control**

**S Figure 8: ICOSL expression in lat II (LMP1+/EBNA2<sup>-</sup>) expressing DLBCL cases**

**S Figure 9: ICOSL expression in cHL cases**

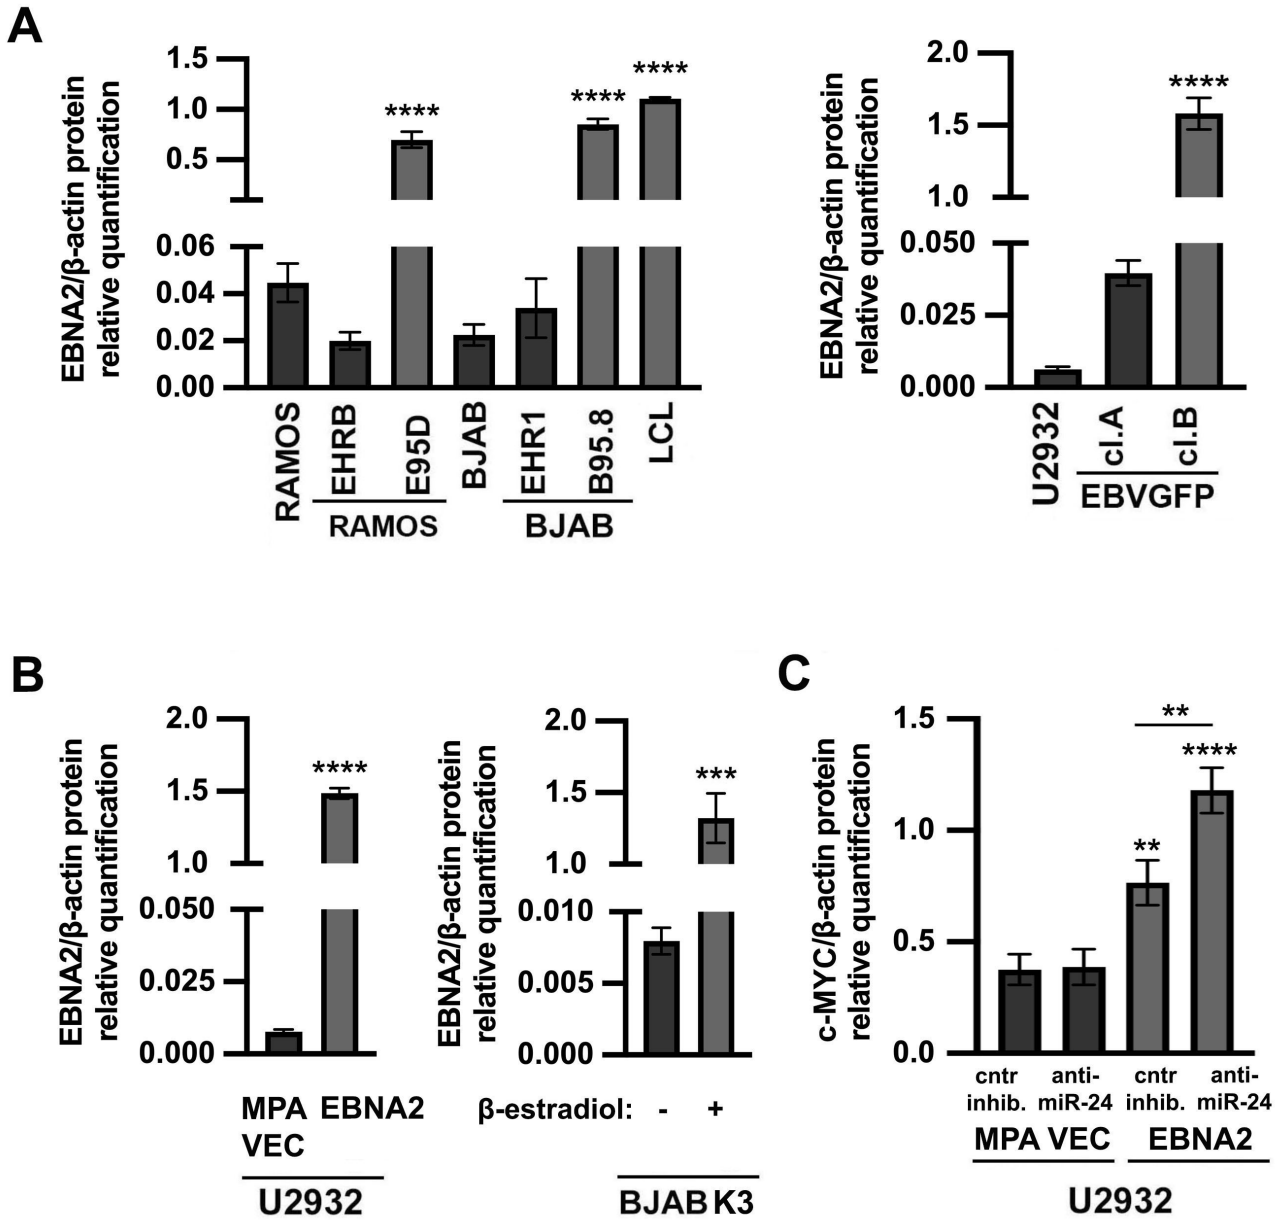

Supplementary figure 1



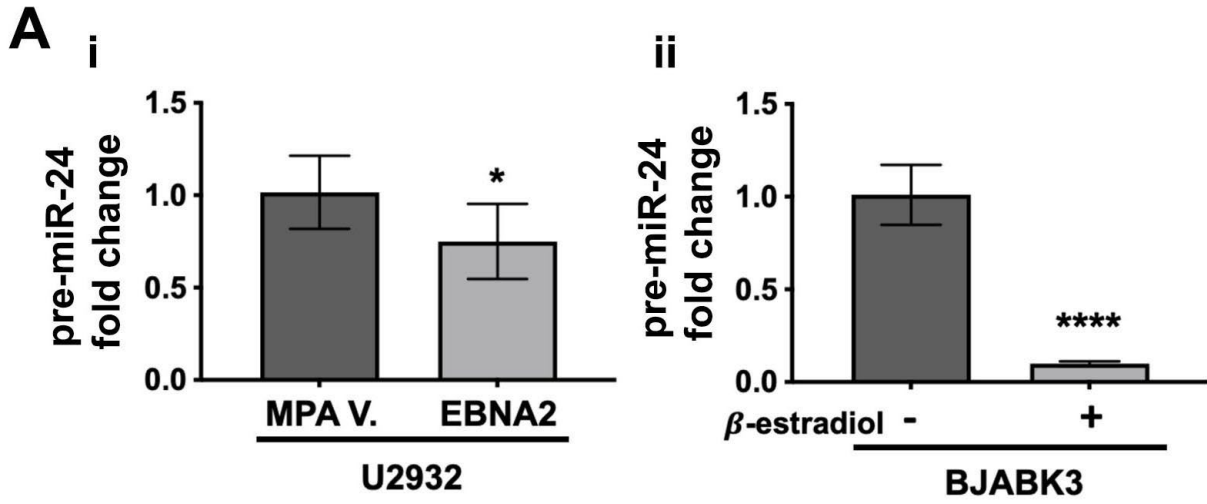

Supplementary figure 2

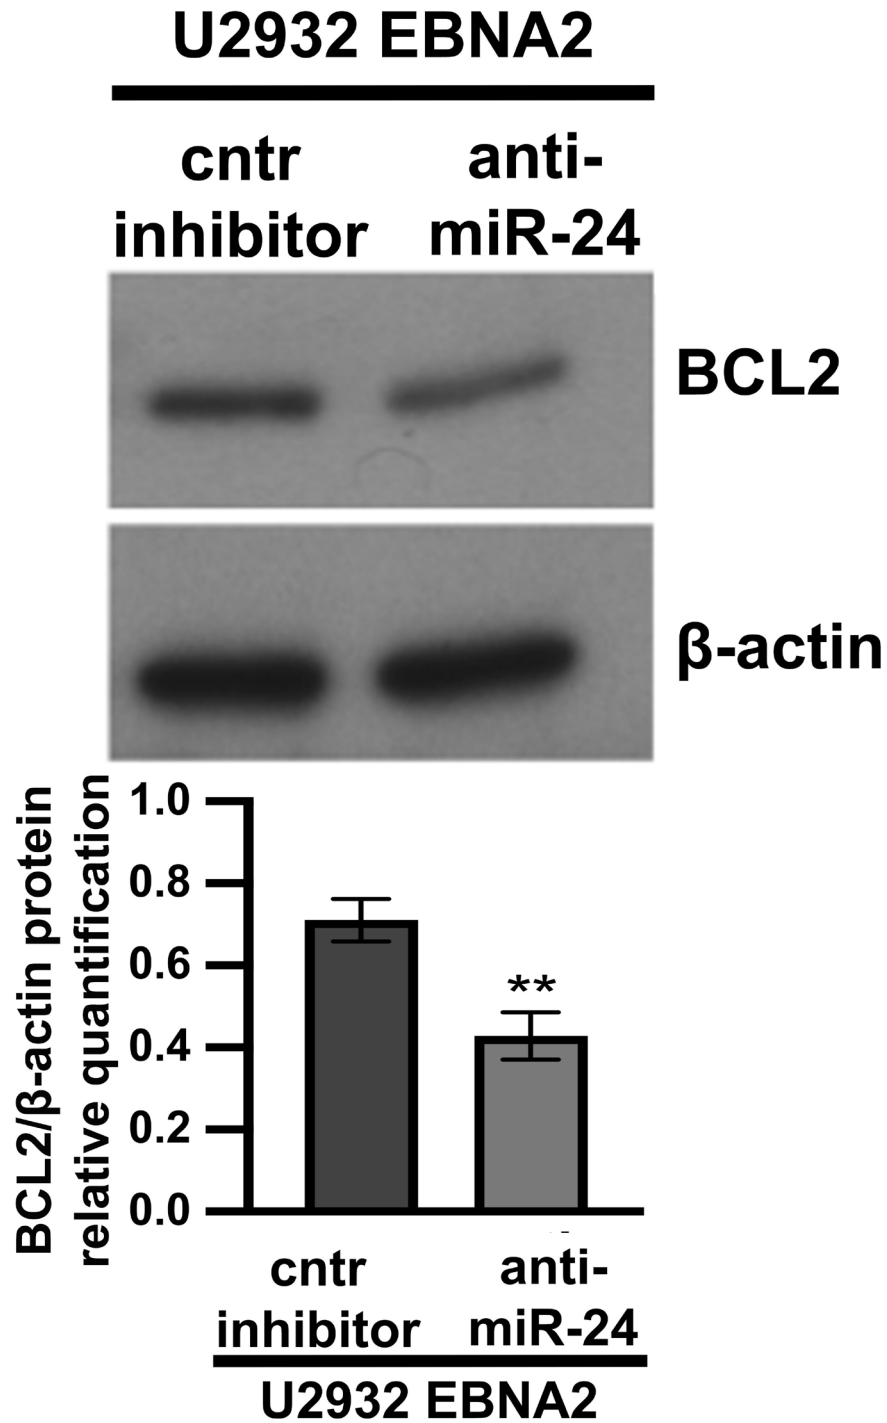

**Supplementary figure 3**

|        | Rome |      | Siena |       | Total     |
|--------|------|------|-------|-------|-----------|
| Cases  | 515  | 100% | 598   | 100 % | 1113      |
| EBV+   | 18   | 3.5% | 21    | 3.5%  | 39 (3.5%) |
| EBNA2+ | 5    | 1%   | 4     | 0.7%  | 9 (0.8%)  |

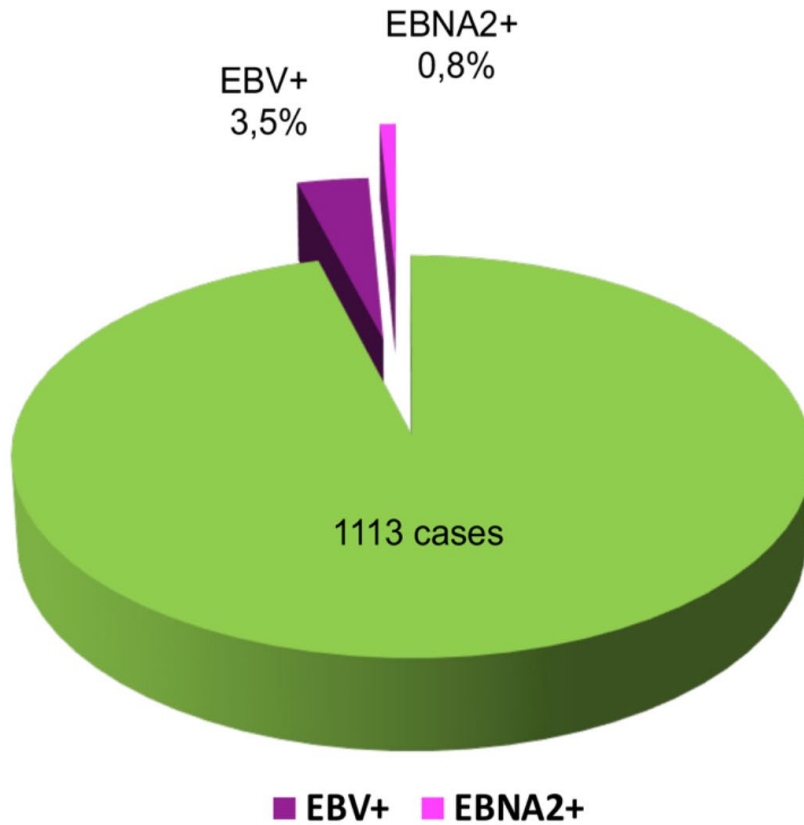

**Supplementary figure 4**

## EBV neg GC DLBCL ICOSL

**A**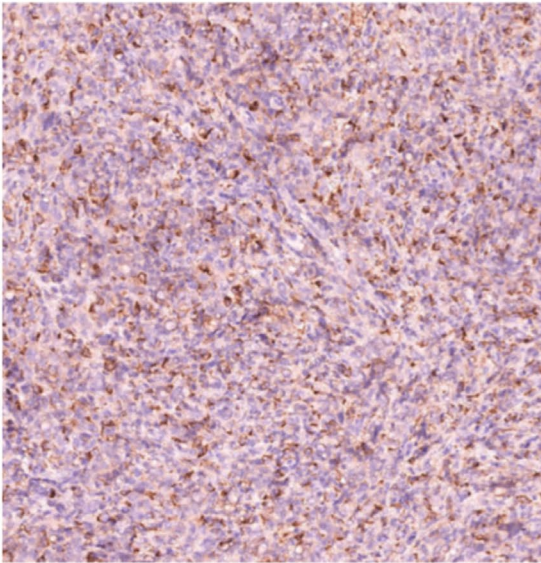**B**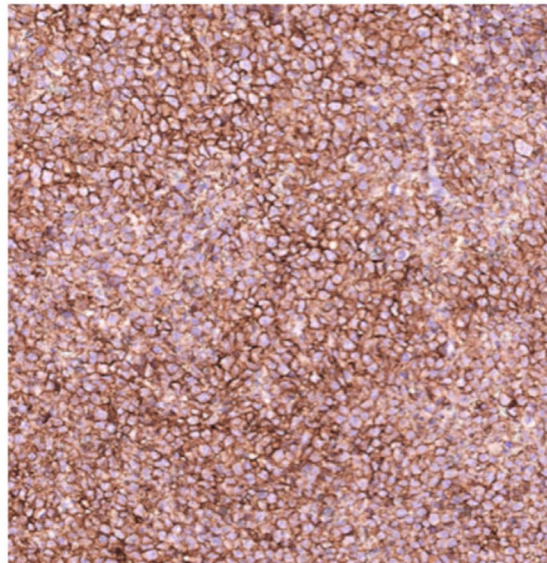

## EBV neg non-GC DLBCL ICOSL

**C**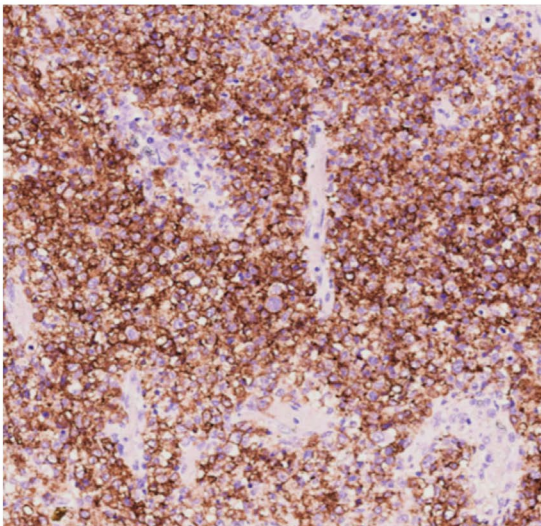**D**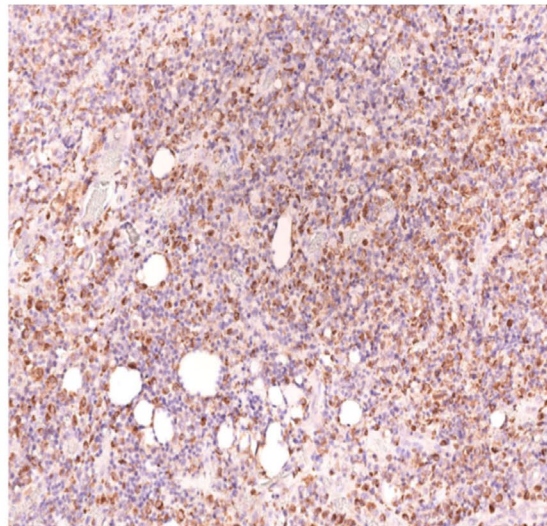

**Supplementary figure 5**

**EBNA2**

**ICOSL**

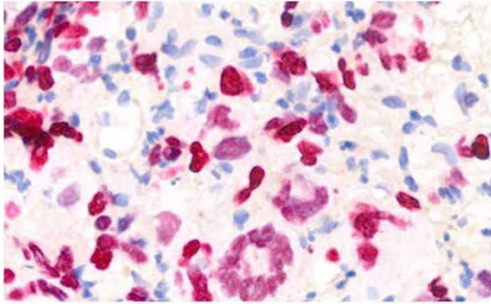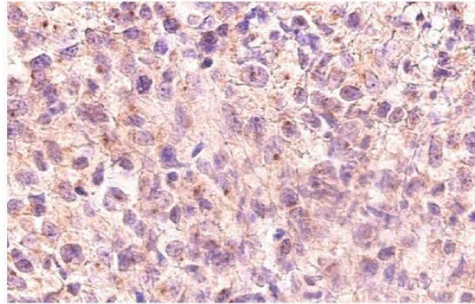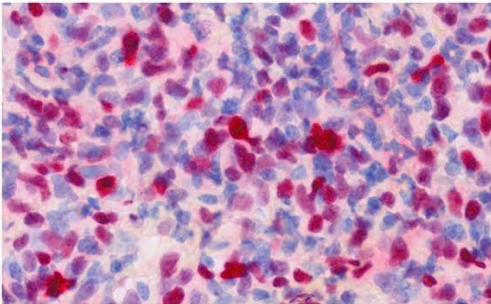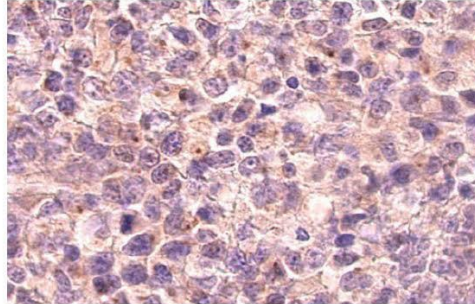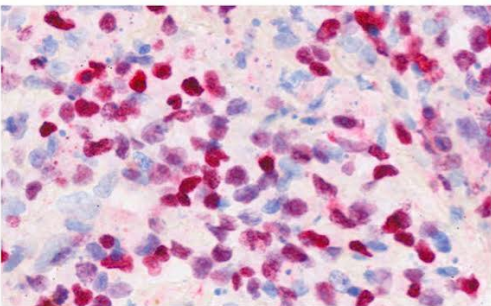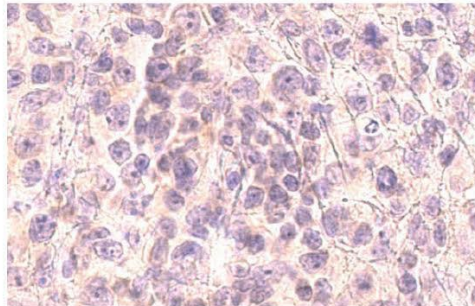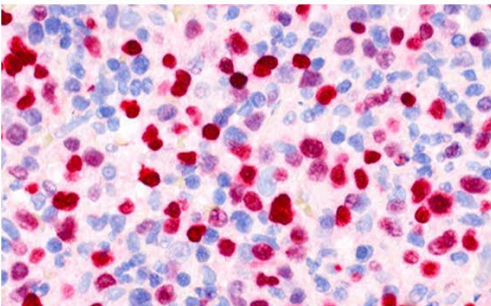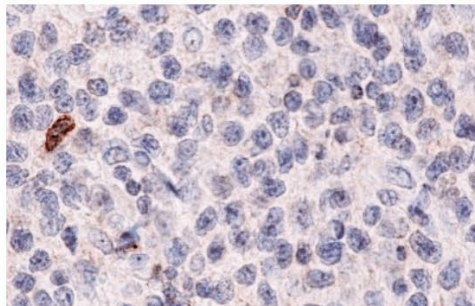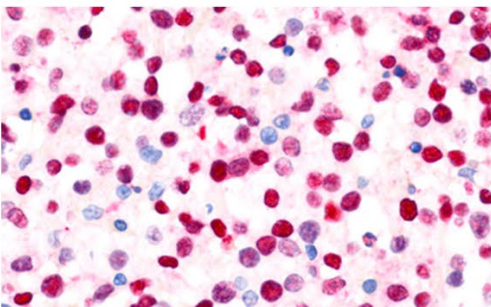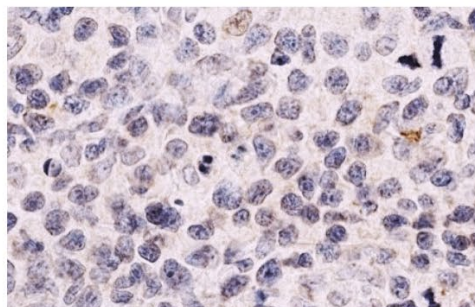

50  $\mu$ m

**Supplementary Figure 6**

## ICOSL in reactive lymph node controls

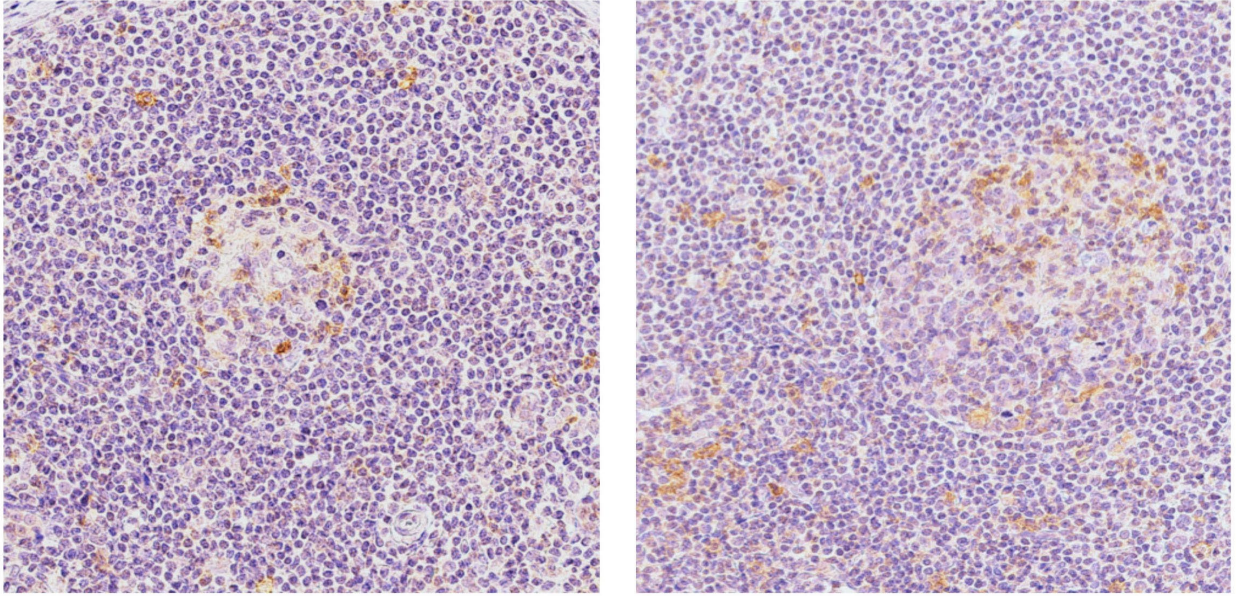

**Supplementary figure 7**

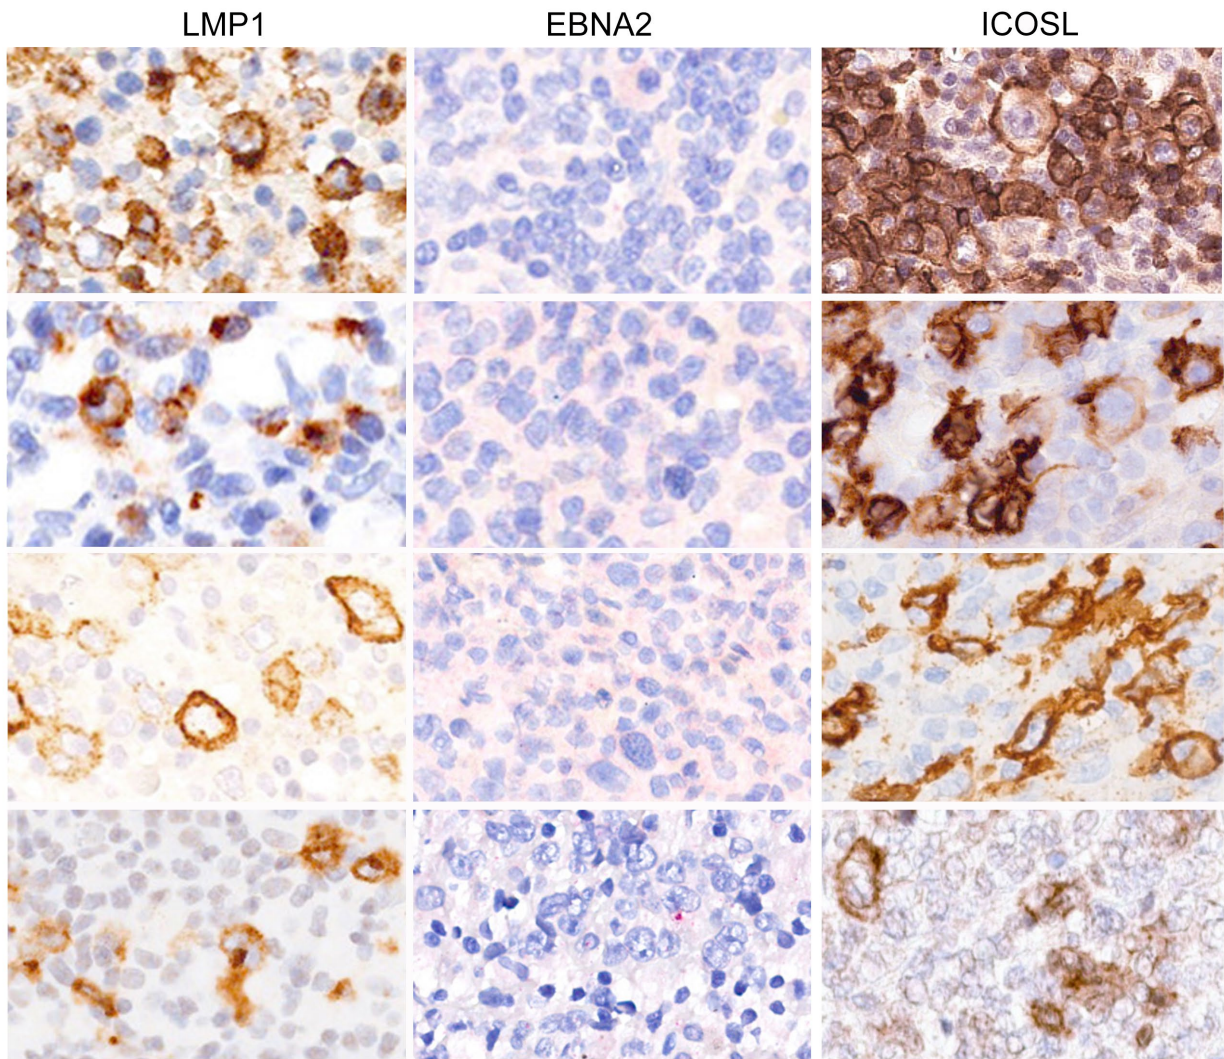

Lat II DLBCLs

### Supplementary figure 8

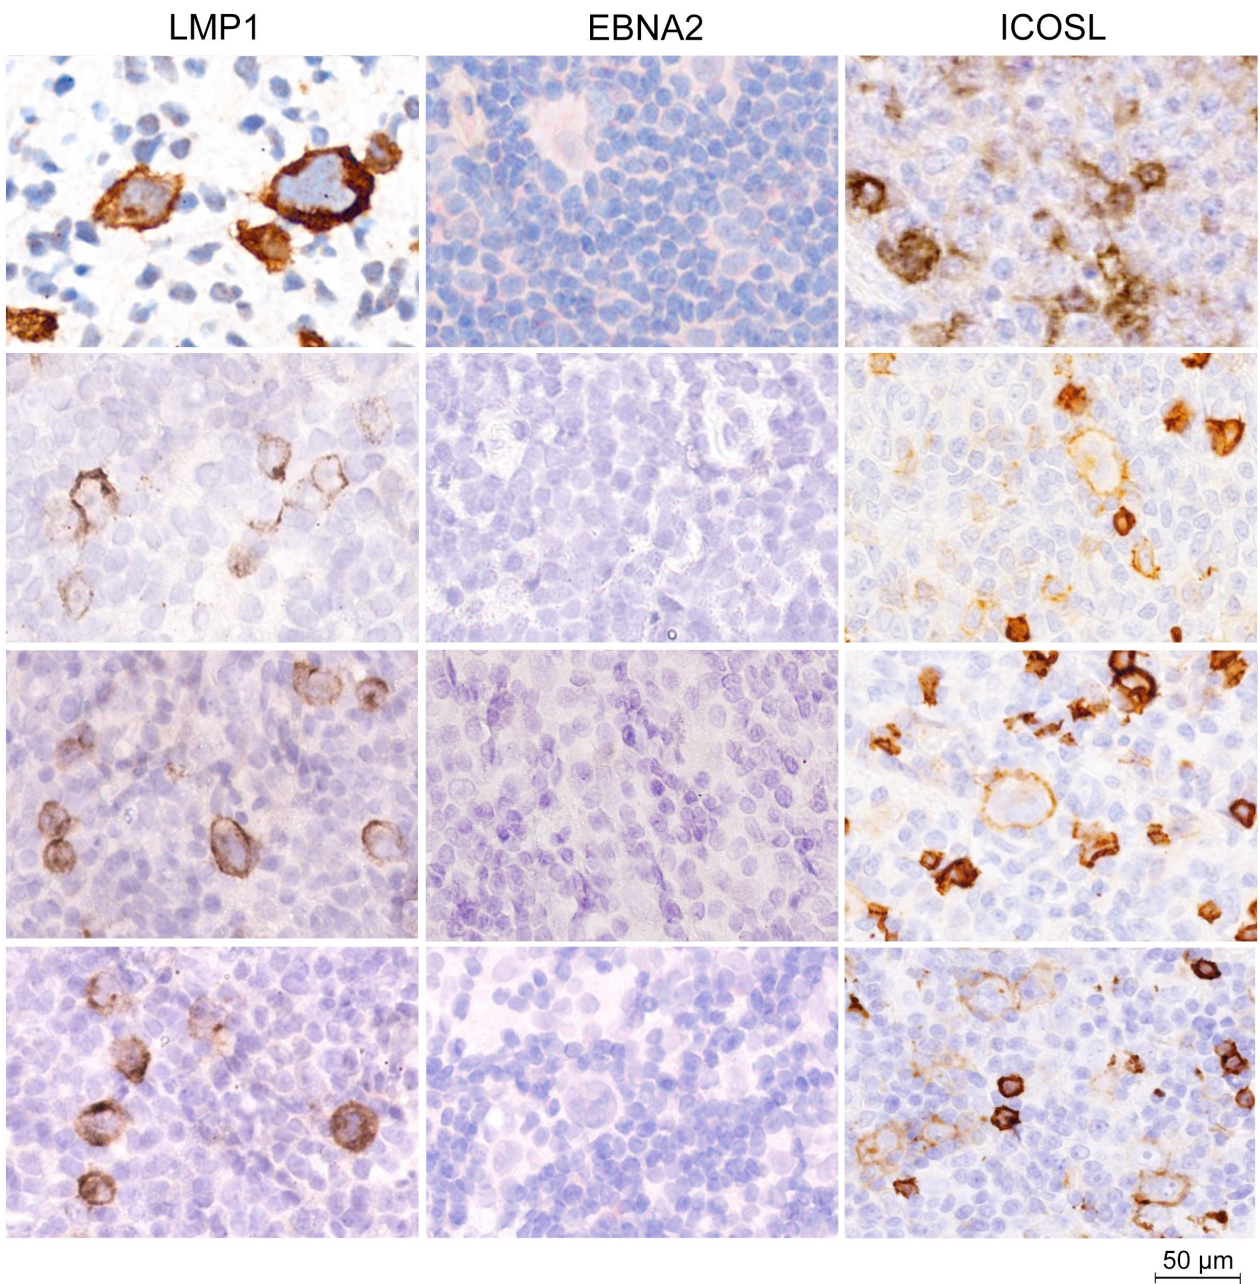

**HL**

**Supplementary figure 9**



**Supplementary Table 1: Cell lines used in this study**

\* B lymphoma cell lines used in this study. The B958 and P3HR1 are the two laboratory strains of

| Cell line*         | Tumor type and EBV status                         | EBNA2 status | Reference                                                                                          |
|--------------------|---------------------------------------------------|--------------|----------------------------------------------------------------------------------------------------|
| U2932              | EBV negative DLBCL                                | Negative     | Amini et al <sup>39</sup>                                                                          |
| U2932 EBVGFP Cl. A | In vitro infected                                 | Negative     | Boccellato et al <sup>40</sup>                                                                     |
| U2932 EBVGFP Cl. B | In vitro infected                                 | Positive     | Boccellato et al <sup>40</sup>                                                                     |
| U2932 EBNA2        | Transfectants                                     | Positive     | Boccellato et al, <sup>40</sup><br>Rosato et al, <sup>27</sup><br>Anastasiadou et al <sup>38</sup> |
| Ramos              | EBV negative BL                                   | Negative     | Ehlin Henriksson et al 1987 <sup>41</sup>                                                          |
| Ramos E95D         | In vitro infected with EBNA2 positive B958 strain | Positive     | Ehlin Henriksson et al 1987 <sup>41</sup>                                                          |
| Ramos EHRB         | In vitro infected with strain lacking EBNA2       | Negative     | Ehlin Henriksson et al 1987 <sup>41</sup>                                                          |
| Bjab               | EBV neg, B cell lymphoma                          | Negative     | Menezes et al, 1975 <sup>42</sup>                                                                  |
| Bjab B958          | In vitro infected with B958 strain                | Positive     | Wennborg et al <sup>43</sup>                                                                       |
| Bjab EHR1          | In vitro infected with strain lacking EBNA2       | Negative     | Wennborg et al <sup>43</sup>                                                                       |
| BJABK3             | B lymphoma                                        | Inducible    | Kempkes et al, 1995 <sup>44</sup>                                                                  |
| P3HR1              | BL                                                | negative     | Bornkamm et al 1982 <sup>45</sup>                                                                  |
| Jijoye             | BL                                                | positive     | Bornkamm et al 1982 <sup>45</sup>                                                                  |
| EREB2-5            | LCL                                               | inducible    | Kempkes et al, 1995 <sup>44</sup>                                                                  |

EBV with and without EBNA2 coding sequences respectively. EREB2-5 LCL contains estrogen inducible EBNA2.

**Supplementary Table 2: Reagents used in this study**

| Reagent                                             | Manufacturer                  | Working solution/dilution | Application      |
|-----------------------------------------------------|-------------------------------|---------------------------|------------------|
| anti-EBNA2 Mouse monoclonal clone PE2, NBP2-50382   | Novus Biologicals™, Biotechne | 1:250/1:150               | Western blot/IHC |
| Human anti-c-Myc Rabbit monoclonal antibody, D84C12 | Cell Signaling Technology     | 1:250                     | Western blot     |
| Human anti-Bcl-2 Rabbit monoclonal antibody, D55G8  | Cell Signaling Technology     | 1:250                     | Western blot     |
| Human anti-β-actin Mouse monoclonal, C4             | Santa Cruz                    | 1:5000                    | Western blot     |
| Goat-anti-rabbit IgG Antibody, HRP conjugate        | Advasta                       | 1:10000                   |                  |

|                                                                                                      |                                              |                                        |                      |
|------------------------------------------------------------------------------------------------------|----------------------------------------------|----------------------------------------|----------------------|
| Goat anti-Mouse IgG Antibody, HRP conjugate                                                          | Sigma-Aldrich, MERCK                         | 1:10000                                | Western blot         |
| ICOSL monoclonal Antibody (HK5.3), PE, eBioscience™                                                  | Thermo Fisher Scientific                     | 1µL/sample                             | Flow cytometry       |
| Rat IgG2a kappa Isotype Control (eBR2a), PE, eBioscience™                                            | Thermo Fisher Scientific                     | 1µL/sample                             | Flow cytometry       |
| BD Pharmingen™ Purified Mouse Anti-Human CD28                                                        | BD Biosciences                               | 1 µg/mL                                | T-cell activation    |
| BD Pharmingen™ Purified Mouse Anti-Human CD3                                                         | BD Biosciences                               | 1 µg/mL                                | T-cell activation    |
| BD Pharmingen™ APC CD4 (L3T4), BD561840                                                              | BD Biosciences                               | 1µL/sample                             | Flow cytometry       |
| BD Pharmingen™ PACIFIC BLUE CD8, BD568207                                                            | BD Biosciences                               | 1µL/sample                             | Flow cytometry       |
| BD Pharmingen™ PE-CY7 IFN-γ, BD560924                                                                | BD Biosciences                               | 1µL/sample                             | Flow cytometry       |
| Cytofix/Cytoperm kit, BD555028                                                                       | BD Biosciences                               | According to the instructions          | Flow cytometry       |
| Annexinv-PE, BD559763                                                                                | BD Biosciences                               | According to the instructions          | Flow cytometry       |
| TaqMan® Assays: hsa-miR-24-3p Catalog number: 4427975, ID: 000402                                    | Thermo Fisher Scientific Applied Biosystems™ | 1X                                     | RT-qPCR/ ddPCR       |
| TaqMan® Assays: RNU6 Catalog number: 4427975, ID: 001973                                             | Thermo Fisher Scientific Applied Biosystems™ | 1X                                     | RT-qPCR/ ddPCR       |
| TaqMan™ Fast Advanced Master Mix for qPCR, no UNG, Catalog number: A44360                            | Thermo Fisher Scientific Applied Biosystems™ | 1X                                     | RT-qPCR              |
| ddPCR supermix for probe (no dUTP)                                                                   | Bio-Rad Laboratories                         | 1X                                     | ddPCR                |
| MISSION® Synthetic microRNA Inhibitor ath-miR416, Negative Control 1                                 | Sigma-Aldrich, Merck                         | 40nM                                   | Transfection         |
| MISSION® Synthetic microRNA Inhibitor, Human, hsa-miR-24-3p                                          | Sigma-Aldrich, Merck                         | 40nM                                   | Transfection         |
| DharmaFect Duo transfection reagent                                                                  | GE Dharmacon                                 | 3µL/cell line                          | Transfection         |
| MISSION 3'UTR Lenti GoClone of ICOSL and MISSION 3'UTR Lenti GoClone-Controls                        | Switchgear Genomics, Sigma-Aldrich, MERCK    | 10000 transducing units (TU)/cell line | Transduction         |
| Polybrene                                                                                            | Sigma-Aldrich, Merck                         | 8 µg/ml                                | Transduction         |
| LightSwitch™ Assay Reagent (100 assays)                                                              | Switchgear Genomics, Sigma-Aldrich, Merck    | 100 µL/sample                          | Luciferase Assay Kit |
| ICOSL Polyclonal Antibody, PA5-96572                                                                 | Invitrogen, Thermo Fisher Scientific         | 1:120                                  | IHC                  |
| miScript II RT Kit HiFlex buffer                                                                     | Qiagen                                       | According to the instructions          | RT                   |
| miScript Precursor Assay 100 reaction tubes, Pre-miR-24-3p and RNU6                                  | Qiagen                                       | 1X                                     | qPCR                 |
| Hs_ICOSLG_1_SG QuantiTect Primer Assay and Hs_GAPDH_1_SG QuantiTect Primer Assay predesigned primers | Qiagen                                       | 1X                                     | qPCR                 |
| miScript SYBR Green PCR Kit                                                                          | Qiagen                                       | According to the instructions          | qPCR                 |

**Supplementary Table 3: ICOSL expression in HL clinical samples**

| Case ID | Diagnosis*<br>HL | Gender | Age | EBER | EBNA2 | LMP1 | ICOSL<br>%    |
|---------|------------------|--------|-----|------|-------|------|---------------|
| 1       | cHL              | Male   | 44  | +    | -     | +    | >90@<br>(20)# |
| 2       | cHL              | Female | 67  | +    | -     | +    | 70<br>(10)    |
| 3       | cHL              | Male   | 49  | +    | -     | +    | 80<br>(30)    |
| 4       | cHL mc           | Male   | 39  | +    | -     | +    | 40<br>(30)    |
| 5       | cHL ns           | Male   | 42  | +    | -     | +    | 70<br>(10)    |
| 6       | cHL ns           | Male   | 47  | +    | -     | +    | 30<br>(20)    |
| 7       | cHL              | Male   | 62  | +    | -     | +    | 80<br>(20)    |
| 8       | cHL              | Female | 28  | +    | -     | +    | 40<br>(10)    |
| 9       | cHL              | Male   | 56  | +    | -     | +    | 70<br>(20)    |
| 10      | cHL              | Male   | 57  | +    | -     | +    | 30<br>(30)    |
| 11      | cHL              | Male   | 35  | +    | -     | +    | 70<br>(10)    |

\* MC-mixed cellularity, ns-nodular sclerosis, @ percentage positive RS cells, # ( ) infiltrating cells
